# Supplementary material for: Mental Health Service Use and Psychopharmacological Treatment Following Psychotic Experiences in Preadolescence
Source: Atypon-hosted journal article supplement (doi:10.1176/appi.ajp.2019.19070724), 2020-02-26
Supplement: appi.ajp.2019.19070724.ds001.pdf [file appi.ajp.2019.19070724.ds001.pdf]

## Supplementary Material

### ICD-10 Diagnoses included in the study from the registers and subgroupings

#### Neurodevelopmental disorders:

- F70-79 Mental retardation
- F80-89 Disorders of psychological development (e.g. autism spectrum disorders)
- F90-98 Behavioral and emotional disorders with onset usually occurring in childhood and adolescence (except F98.0 Enuresis, F98.1 Encopresis (not included at all) F93 Emotional disorders with onset specific to childhood (included in 'Emotional Disorders') F94 Disorders of Social Function,, F98.2 Feeding disorder of infancy and childhood, and 98.9 Unspecified behavioral and emotional disorders with onset usually occurring in childhood and adolescence (included in 'Other Disorders')
- R62 Lack of expected normal physiological development (We included language and speech but not motor function)
- R41.8 Commonly used as mild retardation in clinical practice in Denmark.

#### Emotional Disorders:

- F30-39 Mood disorders (except with psychotic disorders)
- F40-49 Neurotic, stress-related and somatoform disorders
- F93 Emotional disorders with onset specific to childhood

#### Other Disorders:

- F10-19 Mental and behavioral disorders due to psychoactive substance use
- F20-29 Psychotic disorder (plus psychotic mood disorders from mood disorders chapter)
- F50-59 Behavioral syndromes associated with physiological disturbances and physical factors (except F52 Sexual dysfunction, not caused by organic disorder or disease)
- F60-69 Disorders of adult personality and behavior (except F64-66 Gender identity disorders and Sexual disorders)
- F94 Disorders of Social Function
- F98.2 Feeding disorder of infancy and childhood,
- F98.9 Unspecified behavioral and emotional disorders with onset usually occurring in childhood and adolescence
- F99.9 Unspecific mental disorder
- X60-84 Intentional self-harm

### Psychopharmaceuticals included from the registers

#### ADHD medication

- N06BA02 Dexamphetamine
- N06BA04 Methylphenidate
- N06BA09 Atomoxetine
- N06BA12 Lisdexamphetamine
- N06BA07 Modafinil (ikke-registreret indikation)
- N06AX12 Bupropion (ikke-registreret indikation)
- C02AC02 Guanfacine

#### Antidepressives

- N06AB03 fluoxetine
- N06AB04 citalopram
- N06AB05 paroxetine
- N06AB06 sertraline
- N06AB08 fluvoxamine

N06AB10 escitalopram  
N06AA02 Imipramine  
N06AA04 Clomipramine  
N06AA09 Amitriptyline  
N06AA10 Nortriptyline  
N06AA12 Doxepin  
N06AA16 Dosulepine  
N06AF01 Isocarboxazide  
N06AG02 Moclobemide  
N06AX03 Mianserin  
N06AX11 Mirtazapine  
N06AX16 Venlafaxine  
N06AX18 Reboxetine  
N06AX21 Duloxetine  
N06AX22 Agomelatine  
N06AX26 Vortioxetine

**Antipsychotics and lithium:**

N05AA  
N05AB  
N05AC  
N05AD  
N05AE  
N05AF  
N05AG  
N05AH  
N05AL  
N05AN  
N05AX

**Melatonin:**

N05CH  
N05CH01

We did not include other sedatives or benzodiazepines, as they do not constitute primary treatment for mental disorders and would result in false-positives because they are used for fever-seizures and epilepsy.

We did not include antiepileptics (e.g. lamotrigine, valproate), as the indication in children is most often related to epilepsy and would result in false-positives.

The risk of false-positives is regarded as very low for the other pharmacological groups (e.g. treatment for very rare disorders such as central stimulants for narcolepsy)

**Supplementary Table S1. Hazard ratio of a diagnosis of a mental disorder or redemption of prescribed psychopharmaceuticals over approximately 5 years follow-up following presence/nonpresence of psychotic experiences at age 11 years in children with no prior psychiatric diagnosis or psychopharmacological treatment.**

| N=1556                                                                            | N    | Any mental disorder or psychopharmaceutical (N=111) |            | P-value | Model 1      |            | P-value | Model 2      |            | P-value |
|-----------------------------------------------------------------------------------|------|-----------------------------------------------------|------------|---------|--------------|------------|---------|--------------|------------|---------|
|                                                                                   |      | hazard ratio                                        | 95% CI     |         | hazard ratio | 95% CI     |         | hazard ratio | 95% CI     |         |
| No psychotic experiences                                                          | 1494 | ref                                                 |            | .       | ref          |            | .       | ref          |            | .       |
| Psychotic experiences                                                             | 162  | 3.09                                                | 2.02–4.75  | <0.001  | 3.12         | 2.02–4.83  | <0.001  | 3.11         | 2.01–4.81  | <0.001  |
| <b>Stratification by DAWBA ICD–10 diagnosis at baseline (9 missing)</b>           |      |                                                     |            |         |              |            |         |              |            |         |
| No psychotic experiences and no DAWBA ICD–10 diagnosis                            | 1256 | ref                                                 |            | .       | ref          |            | .       | ref          |            | .       |
| Psychotic experiences without DAWBA ICD–10 diagnosis                              | 119  | 2.61                                                | 1.49–4.59  | 0.001   | 2.56         | 1.44–4.54  | 0.001   | 2.53         | 1.43–4.50  | 0.002   |
| DAWBA ICD–10 diagnosis without psychotic experiences                              | 129  | 3.51                                                | 2.14–5.75  | <0.001  | 3.46         | 2.10–5.71  | <0.001  | 3.43         | 2.07–5.68  | <0.001  |
| Psychotic experiences with DAWBA ICD–10 diagnosis                                 | 43   | 7.55                                                | 4.15–13.72 | <0.001  | 9.01         | 4.92–16.52 | <0.001  | 9.18         | 4.99–16.87 | <0.001  |
| <b>Stratification by parental history register mental disorder from 1995–2011</b> |      |                                                     |            |         |              |            |         |              |            |         |
| No psychotic experiences and no parental history of mental disorder               | 1241 | ref                                                 |            | .       | ref          |            | .       | ref          |            | .       |
| Psychotic experiences without parental history of mental disorder                 | 133  | 3.16                                                | 1.94–5.17  | <0.001  | 3.30         | 2.00–5.43  | <0.001  | 3.29         | 2.00–5.42  | <0.001  |
| Parental history of mental disorder without psychotic experiences                 | 153  | 2.23                                                | 1.31–3.80  | 0.003   | 2.39         | 1.38–4.14  | 0.002   | 2.34         | 1.39–4.17  | 0.002   |

|                                                                |    |      |            |        |      |            |        |      |            |        |
|----------------------------------------------------------------|----|------|------------|--------|------|------------|--------|------|------------|--------|
| Psychotic experiences with parental history of mental disorder | 29 | 5.05 | 2.32–11.01 | <0.001 | 5.31 | 2.38–11.82 | <0.001 | 5.26 | 2.36–11.72 | <0.001 |
|----------------------------------------------------------------|----|------|------------|--------|------|------------|--------|------|------------|--------|

DAWBA=the Development and Well-Being Assessment

Model 1 adjusted for sex, perinatal health index and family adversity index (99 missing)

Model 2 further adjusted for IQ (further 2 missing).
